# Supplementary material
Source: MDPI journal article supplement (https://www.mdpi.com/2079-6412/14/4/408)
Supplement: s1 [file s1]

# Supplementary Materials: The “Restoration of the Restoration”: Investigation of a Complex Surface and Interface Pattern in the Roman Wall Paintings of *Volsinii Novi* (Bolsena, Central Italy)

Claudia Pelosi <sup>1,\*</sup>, Filomena Di Stasio <sup>2</sup>, Luca Lanteri <sup>1</sup>, Martina Zuena <sup>3</sup>, Marta Sardara <sup>3</sup> and Armida Sodo <sup>3</sup>

<sup>1</sup> Laboratory of Diagnostics and Materials Science, DEIM Department, University of Tuscia, Largo dell'Università, 01100 Viterbo, Italy; llanteri@unitus.it

<sup>2</sup> DIBAF Department, University of Tuscia, Largo dell'Università, 01100 Viterbo, Italy; f.distasio92@gmail.com

<sup>3</sup> Science Department, University of Rome 3, Via della Vasca Navale 84, 00146 Roma, Italy; martinazuena@gmail.com (M.Z.); marta.sardara@uniroma3.it (M.S.); armida.sodo@uniroma3.it (A.S.)

\* Correspondence: pelosi@unitus.it; Tel.: +39-0761357673

In this document, the original data from SEM-EDS analysis are shown. In each figure, the detail of the examined point with the EDS spectrum and the detected elements are reported with the relative concentrations.

004

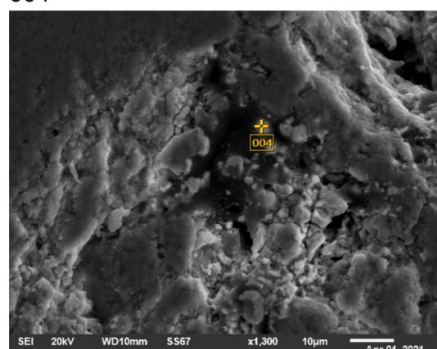

Volt : 20.00 kV  
Mag. : x 1,300  
Date : 2021/04/01  
Pixel : 640 x 480

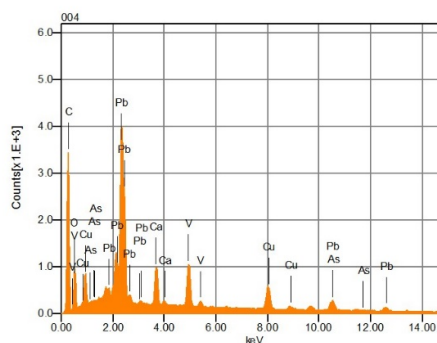

Acquisition Condition  
Instrument : 6010LA  
Volt : 20.00 kV  
Current : ---  
Process Time : T4  
Live time : 60.00 sec.  
Real Time : 65.25 sec.  
DeadTime : 8.00 %  
Count Rate : 5490.00 CPS

| Chemical formula | ms%    | mol%   | Sigma | Net    | K ratio   | Line |
|------------------|--------|--------|-------|--------|-----------|------|
| C                | 43.47  | 77.86  | 0.05  | 83797  | 0.0343535 | K    |
| O                | 8.85   | 11.89  | 0.14  | 21914  | 0.0305109 | K    |
| Ca               | 2.49   | 1.33   | 0.06  | 45493  | 0.0357188 | K    |
| V                | 5.17   | 2.19   | 0.10  | 58260  | 0.0677239 | K    |
| Cu               | 8.15   | 2.76   | 0.28  | 39374  | 0.1147078 | K    |
| As               | 3.59   | 1.03   | 1.73  | 6864   | 0.0446149 | K    |
| Pb               | 28.27  | 2.94   | 0.17  | 286489 | 0.3272884 | M    |
| Total            | 100.00 | 100.00 |       |        |           |      |

JEOL EDS System

JEOL

Figure S1. EDS spectrum and concentration of the elements detected in point 4 of area 1, sample P7.

005

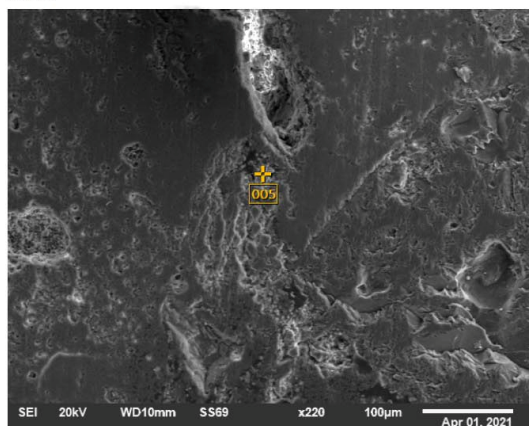

Volt : 20.00 kV  
 Mag. : x 220  
 Date : 2021/04/01  
 Pixel : 640 x 480

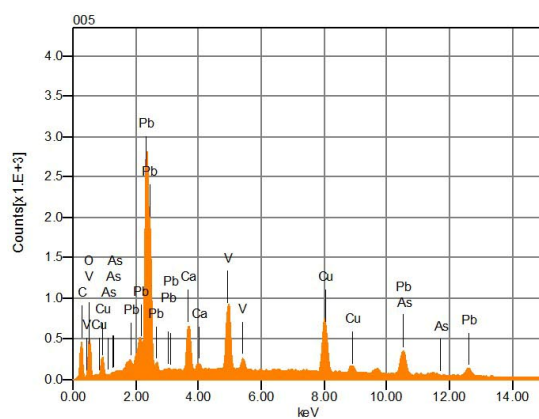

Acquisition Condition  
 Instrument : 6010LA  
 Volt : 20.00 kV  
 Current : ---  
 Process Time : T4  
 Live time : 60.00 sec.  
 Real Time : 63.70 sec.  
 DeadTime : 6.00 %  
 Count Rate : 3663.00 CPS

| Chemical formula | ms%    | mol%   | Sigma | Net    | K ratio   | Line |
|------------------|--------|--------|-------|--------|-----------|------|
| C                | 14.27  | 48.91  | 0.06  | 11034  | 0.0045237 | K    |
| O                | 6.05   | 15.57  | 0.09  | 11747  | 0.0163548 | K    |
| Ca               | 3.28   | 3.37   | 0.06  | 32340  | 0.0253918 | K    |
| V                | 7.94   | 6.42   | 0.09  | 50294  | 0.0584635 | K    |
| Cu               | 18.22  | 11.80  | 0.24  | 51896  | 0.1511885 | K    |
| As               | 11.25  | 6.18   | 1.46  | 12799  | 0.0831852 | K    |
| Pb               | 38.99  | 7.75   | 0.16  | 202389 | 0.2312112 | M    |
| Total            | 100.00 | 100.00 |       |        |           |      |

JEOL EDS System

JEOL

Figure S2. EDS spectrum and concentration of the elements detected in point 5 of area 1, sample P7.

007

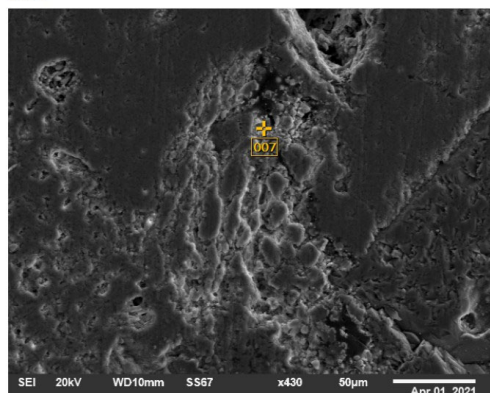

Volt : 20.00 kV  
 Mag. : x 430  
 Date : 2021/04/01  
 Pixel : 640 x 480

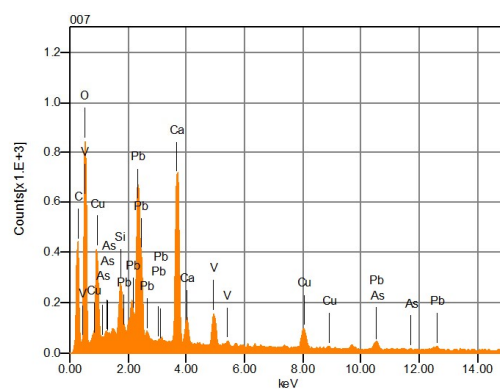

Acquisition Condition  
 Instrument : 6010LA  
 Volt : 20.00 kV  
 Current : ---  
 Process Time : T4  
 Live time : 10.61 sec.  
 Real Time : 11.85 sec.  
 DeadTime : 11.00 %  
 Count Rate : 7066.00 CPS

| Chemical formula | ms%    | mol%   | Sigma | Net   | K ratio   | Line |
|------------------|--------|--------|-------|-------|-----------|------|
| C                | 25.02  | 45.20  | 0.06  | 10489 | 0.0243173 | K    |
| O                | 30.91  | 41.92  | 0.12  | 20611 | 0.1622774 | K    |
| Si               | 1.65   | 1.27   | 0.05  | 7682  | 0.0217281 | K    |
| Ca               | 9.44   | 5.11   | 0.07  | 39930 | 0.1772938 | K    |
| V                | 3.14   | 1.34   | 0.11  | 7827  | 0.0514529 | K    |
| Cu               | 5.59   | 1.91   | 0.33  | 5958  | 0.0981519 | K    |
| As               | 3.86   | 1.12   | 2.03  | 1622  | 0.0596126 | K    |
| Pb               | 20.39  | 2.14   | 0.20  | 45444 | 0.2935878 | M    |
| Total            | 100.00 | 100.00 |       |       |           |      |

JEOL EDS System

JEOL

Figure S3. EDS spectrum and concentration of the elements detected in point 7 of area 1, sample P7.

006

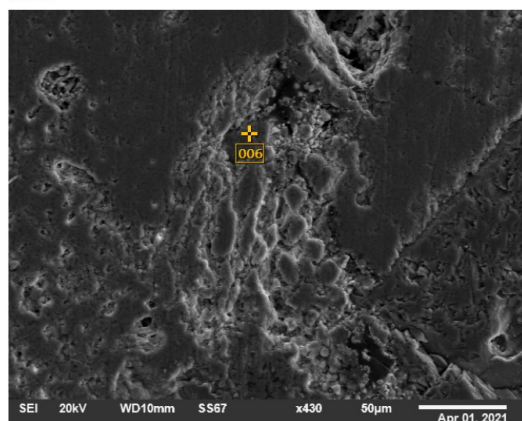

Volt : 20.00 kV  
 Mag. : x 430  
 Date : 2021/04/01  
 Pixel : 640 x 480

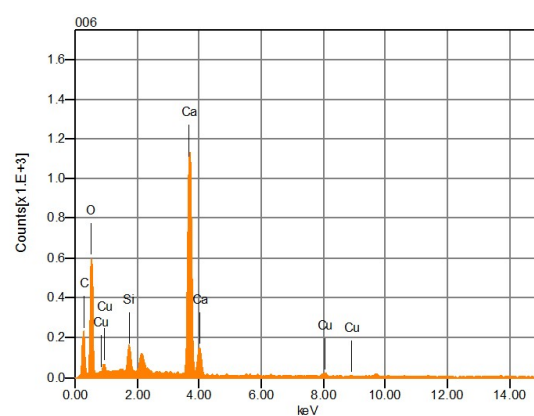

Acquisition Condition  
 Instrument : 6010LA  
 Volt : 20.00 kV  
 Current : ---  
 Process Time : T4  
 Live time : 7.92 sec.  
 Real Time : 8.52 sec.  
 DeadTime : 6.00 %  
 Count Rate : 4872.00 CPS

| Chemical formula | ms%    | mol%   | Sigma | Net   | K ratio   | Line |
|------------------|--------|--------|-------|-------|-----------|------|
| C                | 17.02  | 25.81  | 0.07  | 5378  | 0.0167036 | K    |
| O                | 53.35  | 60.73  | 0.24  | 15560 | 0.1641218 | K    |
| Si               | 1.74   | 1.13   | 0.08  | 4560  | 0.0172803 | K    |
| Ca               | 25.83  | 11.74  | 0.11  | 63378 | 0.3769804 | K    |
| Cu               | 2.05   | 0.59   | 0.60  | 1076  | 0.0237386 | K    |
| Total            | 100.00 | 100.00 |       |       |           |      |

JEOL EDS System

JEOL

**Figure S4.** EDS spectrum and concentration of the elements detected in point 6 of area 1, sample P7.

004

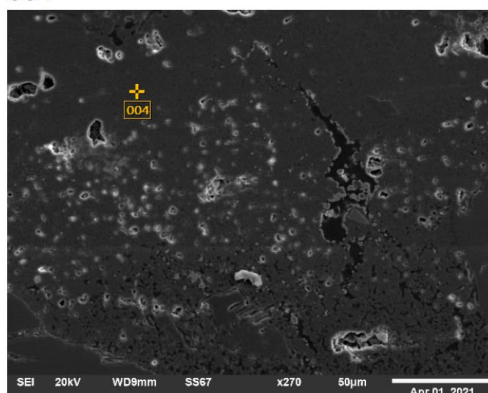

Volt : 20.00 kV  
Mag. : x 270  
Date : 2021/04/01  
Pixel : 1280 x 960

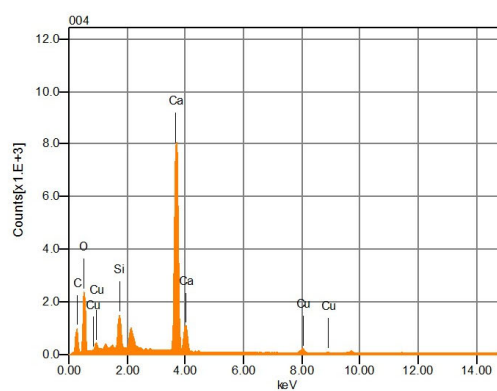

Acquisition Condition  
Instrument : 6010LA  
Volt : 20.00 kV  
Current : ---  
Process Time : T4  
Live time : 60.00 sec.  
Real Time : 64.30 sec.  
DeadTime : 7.00 %  
Count Rate : 4583.00 CPS

| Chemical formula | ms%    | mol%   | Sigma | Net    | K ratio   | Line |
|------------------|--------|--------|-------|--------|-----------|------|
| C                | 14.63  | 24.39  | 0.09  | 22849  | 0.0093671 | K    |
| O                | 43.95  | 54.99  | 0.34  | 58722  | 0.0817571 | K    |
| Si               | 3.25   | 2.31   | 0.10  | 46446  | 0.0232318 | K    |
| Ca               | 34.07  | 17.02  | 0.13  | 462495 | 0.3631313 | K    |
| Cu               | 4.11   | 1.29   | 0.72  | 11967  | 0.0348642 | K    |
| Total            | 100.00 | 100.00 |       |        |           |      |

JEOL EDS System

JEOL

Figure S5. EDS spectrum and concentration of the elements detected in point 6 of area 1, sample P8.

003

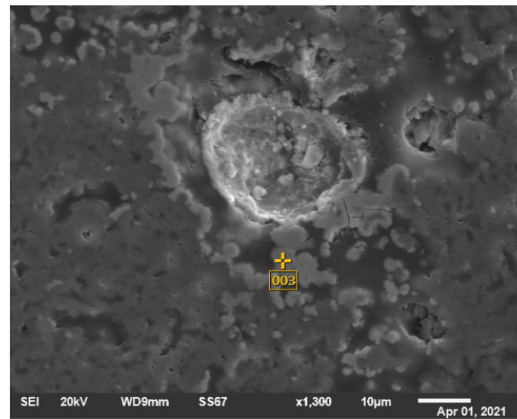

Volt : 20.00 kV  
Mag. : x 1,300  
Date : 2021/04/01  
Pixel : 640 x 480

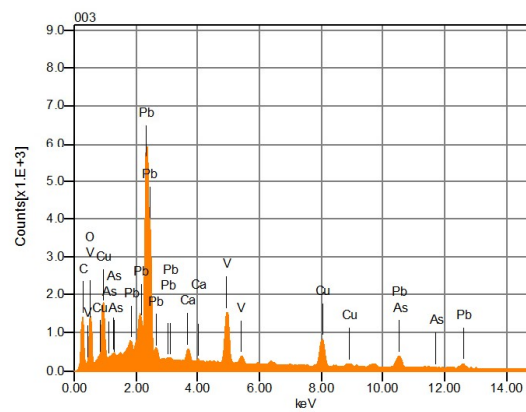

Acquisition Condition  
Instrument : 6010LA  
Volt : 20.00 kV  
Current : ---  
Process Time : T4  
Live time : 60.00 sec.  
Real Time : 67.59 sec.  
DeadTime : 12.00 %  
Count Rate : 7425.00 CPS

| Chemical formula | ms%    | mol%   | Sigma | Net    | K ratio   | Line |
|------------------|--------|--------|-------|--------|-----------|------|
| C                | 20.83  | 58.97  | 0.08  | 32128  | 0.0131712 | K    |
| O                | 8.94   | 19.00  | 0.13  | 29933  | 0.0416755 | K    |
| Ca               | 1.08   | 0.92   | 0.08  | 18524  | 0.0145439 | K    |
| V                | 7.77   | 5.19   | 0.13  | 86247  | 0.1002578 | K    |
| Cu               | 11.19  | 5.99   | 0.35  | 55824  | 0.1626295 | K    |
| As               | 5.89   | 2.68   | 2.08  | 11830  | 0.0768879 | K    |
| Pb               | 44.30  | 7.27   | 0.22  | 428667 | 0.4897141 | M    |
| Total            | 100.00 | 100.00 |       |        |           |      |

JEOL EDS System

JEOL

Figure S6. EDS spectrum and concentration of the elements detected in point 3 of area 2, sample P8.

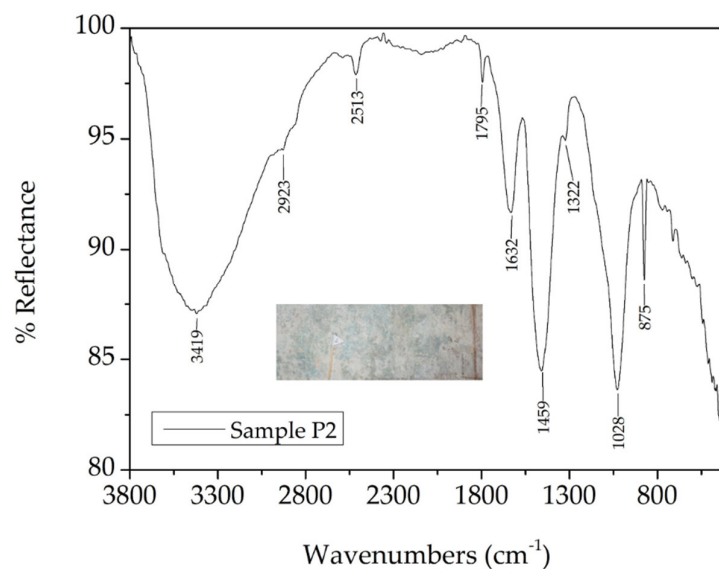

**Figure S7.** FTIR spectrum of sample P2.

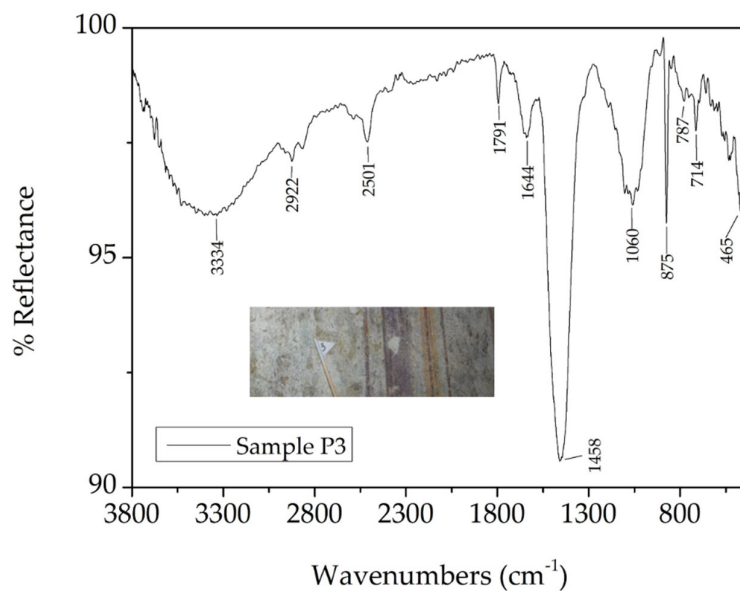

**Figure S8.** FTIR spectrum of sample P3.

**Table S1.** Results of XRF analysis. The detected elements are reported in decrescent order of counts.

| Point and colour  | Detected elements      |
|-------------------|------------------------|
| X1, brown         | Ca, Fe, Sr, Cu, Pb     |
| X2, orange-red    | Ca, Fe, Sr, Cu, Pb     |
| X3, amaranth      | Ca, Fe, Sr, Pb         |
| X4, red           | Ca, Fe, Sr, Pb, Cu     |
| X5, green         | Ca, Fe, Cu, Sr, Pb     |
| X6, yellow        | Ca, Fe, Pb, Cu, Sr     |
| X7, green         | Cu, Ca, Pb, Fe, Sr     |
| X8, red           | Ca, Fe, Cu, Sr, Pb, Ti |
| X9, blue          | Ca, Cu, Fe, Pb, Sr     |
| X10, orange       | Ca, Cu, Pb, Fe, Sr     |
| X11, brown violet | Ca, Fe, Cu, Pb, Sr     |

---

|                               |                        |
|-------------------------------|------------------------|
| X12, light blue               | Ca, Cu, Fe, Sr, Pb, Ti |
| X13, yellow                   | Ca, Fe, Sr, Cu, Pb, Ti |
| X14, amaranth                 | Ca, Fe, Sr, Pb, Cu     |
| X15, green                    | Ca, Fe, Pb, Cu, Sr     |
| X16, green                    | Ca, Fe, Cu, Sr, Pb, Ti |
| X17, green-blue (restoration) | Ca, Ti, Cr, Fe         |
| X18, green-blue (original)    | Ca, Cu, Fe, Pb, Sr, Ti |
| X19, red                      | Ca, Fe, Pb, Cu, Sr     |
| X20, yellow                   | Fe, Ca, Cu, Pb, Sr     |
| X21, green                    | Ca, Cu, Pb, Fe, Sr     |

---
